# Supplementary material for: Unexpected mitochondrial lineage diversity within the genus Alonella Sars, 1862 (Crustacea: Cladocera) across the Northern Hemisphere
Source: PeerJ. 2021 Feb 1;9:e10804. doi: 10.7717/peerj.10804 (PMC7860113; doi:10.7717/peerj.10804)
Supplement: Supplemental Information 4 — Clade designations correspond to those in other tables. [file peerj-09-10804-s004.xls]

## Sheet: NCBI Sequence numbers
Group	Clade	Subclade	Specimen ID	Country	State	Locality	Latitude	Longitude	NCBI or BOLD - COI accession number	NCBI - 16S accession number	Reference
excisa	J	J1	0001_Ethiopia1	Ethiopia	Oromia	A roadside lake 1, Sanetti tableland, Bale Mountains	6.78463	39.8043		MN598677	This study
excisa	J	J1	0002_Ethiopia1	Ethiopia	Oromia	A roadside lake 1, Sanetti tableland, Bale Mountains	6.78463	39.8043	MN608113	MN598678	This study
excisa	J	J1	0003_Ethiopia1	Ethiopia	Oromia	A roadside lake 1, Sanetti tableland, Bale Mountains	6.78463	39.8043	MN608114	MN598679	This study
excisa	J	J2	0004_Ethiopia2	Ethiopia	Oromia	A puddle in the walley of River Weib, Sodota camp side, Bale Mountains	7.01563	39.7059	MN608115		This study
excisa	J	J2	0005_Ethiopia2	Ethiopia	Oromia	A puddle in the walley of River Weib, Sodota camp side, Bale Mountains	7.01563	39.7059	MN608116		This study
excisa	J	J2	0006_Ethiopia3	Ethiopia	Oromia	A small lake 2 near Mountain of Konte, Bale Mountains	6.85458	39.8928		MN598680	This study
excisa	J	J2	0007_Ethiopia4	Ethiopia	Oromia	A small lake 1 near Mountain of Konte, Bale Mountains	6.85453	39.8929	MN608117	MN598681	This study
excisa	J	J2	0007a_Ethiopia4	Ethiopia	Oromia	A small lake 1 near Mountain of Konte, Bale Mountains	6.85453	39.8929	MN608118		This study
excisa	J	J1	0008_Ethiopia4	Ethiopia	Oromia	A small lake 1 near Mountain of Konte, Bale Mountains	6.85453	39.8929	MN608119	MN598682	This study
excisa	J	J1	0009_Ethiopia5	Ethiopia	Oromia	A roadside lake 2, Sanetti tableland, Bale Mountains	6.8858	39.7343	MN608120		This study
excisa	E	E1	0011_Korea1	South Korea	Jeju-do	A pond 3 near Hallasan	33.4317	126.598	MN608121	MN598683	This study
excisa	E	E1	0012_Korea1	South Korea	Jeju-do	A pond 3 near Hallasan	33.4317	126.598	MN608122	MN598684	This study
excisa	E	E1	0012b_Korea1	South Korea	Jeju-do	A pond 3 near Hallasan	33.4317	126.598	MN608123		This study
excisa	E	E1	0013_Korea2	South Korea	Jeju-do	A stream near Daecheon River	33.4343	126.752	MN608124	MN598685	This study
excisa	E	E1	0014_Korea2	South Korea	Jeju-do	A stream near Daecheon River	33.4343	126.752	MN608125	MN598686	This study
excisa	E	E1	0014a_Korea2	South Korea	Jeju-do	A stream near Daecheon River	33.4343	126.752	MN608126		This study
excisa	E	E1	0015_Korea2	South Korea	Jeju-do	A stream near Daecheon River	33.4343	126.752	MN608127	MN598687	This study
excisa	E	E1	0016_Korea2	South Korea	Jeju-do	A stream near Daecheon River	33.4343	126.752	MN608128	MN598688	This study
excisa	D	D3	0017_Rus_Altay	Russia	Altay Republic	A small warm lake 5, Tuguskol, the vicinities of Edigan village	51.1893	86.5644	MN608129	MN598689	This study
excisa	D	D3	0018_Rus_Altay	Russia	Altay Republic	A small warm lake 5, Tuguskol, the vicinities of Edigan village	51.1893	86.5644	MN608130	MN598690	This study
exigua	B	B1	0019_Rus_Arkhangelsk1	Russia	Arkhangelsk Area	A lake, Pinizhsky State Natural Reserve	64.5837	42.8577		MN598691	This study
excisa	D	D1	0020_Rus_Arkhangelsk2	Russia	Arkhangelsk Area	A lake with Potamogeton sp. and Utricularia sp. on the glade 26/82, Pinizhsky State Natural Reserve	64.6077	42.8433	MN608131	MN598692	This study
nana	A	A1	0021_Rus_Kabardino-Balkaria	Russia	Kabardino-Balkarian Republic	Lake Komsomolskoe	43.3322	42.8097		MN598693	This study
nana	A	A1	0022_Rus_Kabardino-Balkaria	Russia	Kabardino-Balkarian Republic	Lake Komsomolskoe	43.3322	42.8097		MN598694	This study
excisa	D	D3	0023_Rus_Kamchatka	Russia	Kamchatka Area	A lake near the mountain Taunshits, Kronotsky State Natural Reserve	54.4569	159.791	MN608132	MN598695	This study
excisa	D	D3	0024_Rus_Kamchatka	Russia	Kamchatka Area	A lake near the mountain Taunshits, Kronotsky State Natural Reserve	54.4569	159.791	MN608133	MN598696	This study
excisa	G	G2	0025_Rus_Kemerovo	Russia	Kemerovo Area	A pond near the road Kemerovo-Anzhero-Sunzhensk, 6 km from Kemerovo	55.6018	86.165	MN608134		This study
excisa	G	G2	0026_Rus_Kemerovo	Russia	Kemerovo Area	A pond near the road Kemerovo-Anzhero-Sunzhensk, 6 km from Kemerovo	55.6018	86.165	MN608135	MN598697	This study
excisa	D	D1	0027_Rus_Kostroma	Russia	Kostroma Area	A pool near the small road to Polomsky Bam	58.2111	44.3088	MN608136	MN598698	This study
excisa	G	G1	0028_Rus_Krasnoyarsk1	Russia	Krasnoyarsk Territory	A roadside channel near the road Krasnoyarsk-Kansk	55.9117	93.6946	MN608137	MN598699	This study
excisa	G	G1	0028a_Rus_Krasnoyarsk1	Russia	Krasnoyarsk Territory	A roadside channel near the road Krasnoyarsk-Kansk	55.9117	93.6946	MN608138		This study
excisa	D	D1	0029_Rus_Krasnoyarsk2	Russia	Krasnoyarsk Territory	A bayou of Yenisei River on the island Tatyshev, Krasnoyarsk	56.01	92.56	MN608139	MN598700	This study
nana	A	A2	0030_USA	U.S.A.	Massachusetts	Walden Pond	42.4397	-70.3347		MN598701	This study
exigua	B	B1	0031_Rus_Moscow	Russia	Moscow Area	Dead Lake in the vicinities of Krasnaya Pahra village	55.45	37.2167		MN598702	This study
exigua	B	B1	0032_Rus_Moscow	Russia	Moscow Area	Dead Lake in the vicinities of Krasnaya Pahra village	55.45	37.2167		MN598703	This study
exigua	B	B1	0033_Rus_Moscow	Russia	Moscow Area	Dead Lake in the vicinities of Krasnaya Pahra village	55.45	37.2167		MN598704	This study
exigua	B	B1	0034_Rus_Moscow	Russia	Moscow Area	Dead Lake in the vicinities of Krasnaya Pahra village	55.45	37.2167		MN598705	This study
nana	A	A1	0035_Rus_Murmansk	Russia	Murmansk Area	A small pool near Lake Dal’nee	55.45	37.2167		MN598706	This study
exigua	B	B1	0036_Mongolia	Mongolia	Olgiy Aimag	An affluent of unnamed small river, Mongolian Altai	48.548	88.4686		MN598707	This study
excisa	G	G1	0037_Rus_Omsk	Russia	Omsk Area	A swamp 2 near the village Znamenskoe	57.1555	73.808		MN598708	This study
excisa	G	G1	0038_Rus_Omsk	Russia	Omsk Area	A swamp 2 near the village Znamenskoe	57.1555	73.808		MN598709	This study
excisa	E	E1	0039_Rus_Primorski1	Russia	Primorski Territory	A small swamp near the Manchzhurka River, the vicinities of Lake Khanka	44.7961	131.999	MN608140	MN598710	This study
excisa	E	E1	0040_Rus_Primorski1	Russia	Primorski Territory	A small swamp near the Manchzhurka River, the vicinities of Lake Khanka	44.7961	131.999		MN598711	This study
excisa	E	E1	0041_Rus_Primorski2	Russia	Primorski Territory	A swamp with Carex sp. sp. and Salix sp., Khankaysky State Biosphere Reservoir	44.6638	132.587	MN608141	MN598712	This study
excisa	E	E1	0041a_Rus_Primorski2	Russia	Primorski Territory	A swamp with Carex sp. sp. and Salix sp., Khankaysky State Biosphere Reservoir	44.6638	132.587	MN608142		This study
excisa	I	I1	0042_Rus_Primorski2	Russia	Primorski Territory	A swamp with Carex sp. sp. and Salix sp., Khankaysky State Biosphere Reservoir	44.6638	132.587		MN598713	This study
excisa	G	G2	0043_Rus_Tomsk1	Russia	Tomsk Area	An affluent on Island Ferma, River Ob'	56.417	84.0532		MN598714	This study
excisa	D	D1	0044_Rus_Tomsk1	Russia	Tomsk Area	An affluent on Island Ferma, River Ob'	56.417	84.0532		MN598715	This study
excisa	D	D1	0046_Rus_Tomsk2	Russia	Tomsk Area	An oxbow lake near Preobrazhenskiy Cathedral, Surgut	61.2339	73.4298		MN598716	This study
excisa	G	G2	0048_Rus_Tomsk3	Russia	Tomsk Area	An unnamed oxbow lake near Tom’ River	54.48	84.91		MN598717	This study
excisa	G	G2	0049_Rus_Tuva1	Russia	Tuva Republic	A pool near Lake Tore-Khol’	50.0633	96.133	MN608143		This study
excisa	G	G2	0050_Rus_Tuva1	Russia	Tuva Republic	A pool near Lake Tore-Khol’	50.0633	96.133	MN608144	MN598718	This study
excisa	D	D3	0051_Rus_Tuva2	Russia	Tuva Republic	Kaha-Hol' Lake	51.3586	89.4588		MN598719	This study
excisa	D	D1	0052_Rus_Tuva2	Russia	Tuva Republic	Kaha-Hol' Lake	51.3586	89.4588		MN598720	This study
excisa	G	G1	0053_Rus_Tyumen	Russia	Tyumen Area	A mine lake near the village Zaikovo, in the vicinities of Tymen	57.1313	65.6602		MN598721	This study
excisa	G	G1	0054_Rus_Tyumen	Russia	Tyumen Area	A mine lake near the village Zaikovo, in the vicinities of Tymen	57.1313	65.6602		MN598722	This study
excisa	G	G1	0054a_Rus_Tyumen	Russia	Tyumen Area	A mine lake near the village Zaikovo, in the vicinities of Tymen	57.1313	65.6602	MN608145		This study
excisa	D	D3	0055_Rus_Yakutia1	Russia	Yakutia Republic	Lake Ryba, Samoylovsky island	72.3734	126.488	MN608146	MN598723	This study
excisa	I	I1	0056_Rus_Yakutia2	Russia	Yakutia Republic	A reservoir Chuoroktayi near the federal highway “Kolyma”	62.0551	132.773		MN598724	This study
excisa	I	I1	0057_Rus_Yakutia2	Russia	Yakutia Republic	A reservoir Chuoroktayi near the federal highway “Kolyma”	62.0551	132.773		MN598725	This study
excisa	I	I1	0058_Rus_Yakutia3	Russia	Yakutia Republic	A roadside lake near the village Arylah	62.4573	130.944		MN598726	This study
excisa	I	I1	0059_Rus_Yakutia3	Russia	Yakutia Republic	A roadside lake near the village Arylah	62.4573	130.944		MN598727	This study
exigua	B	B1	0060_Rus_Yakutia4	Russia	Yakutia Republic	A semidried bayou on the island in front of microdistrict 202, Yakutsk	62.0301	129.776		MN598728	This study
excisa	D	D3	0061_Rus_Yakutia4	Russia	Yakutia Republic	A semidried bayou on the island in front of microdistrict 202, Yakutsk	62.0301	129.776	MN608147	MN598729	This study
exigua	B	B1	0062_Rus_Yakutia5	Russia	Yakutia Republic	A lake 1 in the vicinities of Kur’ya Strelka	62.0186	129.757		MN598730	This study
exigua	B	B1	0063_Rus_Yakutia5	Russia	Yakutia Republic	A lake 1 in the vicinities of Kur’ya Strelka	62.0186	129.757		MN598731	This study
exigua	B	B1	0064_Rus_Yakutia5	Russia	Yakutia Republic	A lake 1 in the vicinities of Kur’ya Strelka	62.0186	129.757		MN598732	This study
exigua	B	B1	0065_Rus_Yakutia5	Russia	Yakutia Republic	A lake 1 in the vicinities of Kur’ya Strelka	62.0186	129.757		MN598733	This study
excisa	I	I1	0066_Rus_Yakutia6	Russia	Yakutia Republic	A lake 2 in the vicinities of Kur’ya Strelka	62.0215	129.752		MN598734	This study
excisa	I	I1	0067_Rus_Yakutia6	Russia	Yakutia Republic	A lake 2 in the vicinities of Kur’ya Strelka	62.0215	129.752		MN598735	This study
excisa	G	G1	0068_Rus_Yakutia7	Russia	Yakutia Republic	Lake Tabaga	61.829	129.616		MN598736	This study
excisa	I	I1	0069_Rus_Yakutia8	Russia	Yakutia Republic	Lake Syrdah	62.578	130.87		MN598737	This study
excisa	I	I1	0070_Rus_Yakutia8	Russia	Yakutia Republic	Lake Syrdah	62.578	130.87		MN598738	This study
excisa	I	I1	0071_Rus_Yakutia8	Russia	Yakutia Republic	Lake Syrdah	62.578	130.87		MN598739	This study
exigua	B	B1	0072_Rus_Yakutia9	Russia	Yakutia Republic	A lake in the village Tuluna, the vivinities of Lake Tergyldzhima	62.806	131.075		MN598740	This study
exigua	B	B1	0073_Rus_Yakutia9	Russia	Yakutia Republic	A lake in the village Tuluna, the vivinities of Lake Tergyldzhima	62.806	131.075		MN598741	This study
excisa	I	I2	0074_Rus_Yakutia10	Russia	Yakutia Republic	A lake near the road, the vivinities of Lake Beydinga	62.398	130.802		MN598742	This study
excisa	H	H1	0075_Rus_Yaroslavl1	Russia	Yaroslavl Area	A pond near the “T-34” monument, Kokshina Street, Pereslavl-Zalessky	56.75	38.86		MN598743	This study
excisa	H	H1	0076_Rus_Yaroslavl1	Russia	Yaroslavl Area	A pond near the “T-34” monument, Kokshina Street, Pereslavl-Zalessky	56.75	38.86		MN598744	This study
excisa	H	H1	0077_Rus_Yaroslavl2	Russia	Yaroslavl Area	A pond in the botanical garden, Pereslavl-Zalessky	56.71	38.83		MN598745	This study
excisa	H	H1	0078_Rus_Yaroslavl3	Russia	Yaroslavl Area	A pond on Gagarina Street, Pereslavl-Zalessky	56.73	38.84		MN598746	This study
excisa	D	D1	0079_Rus_Krasnoyarsk2	Russia	Krasnoyarsk Territory	A bayou of Yenisei River on the island Tatyshev, Krasnoyarsk	56.01	92.56		MN598747	This study
exigua	B	B2	0080_CzechRepublic1	Czech Republic		Zoldanka Pond	49.4122	13.8204	MN608148	MN598748	This study
excisa	H	H2	0081_CzechRepublic2	Czech Republic		A mire near Kynicky	49.0273	15.9489	MN608149		This study
excisa	H	H1	0082_CzechRepublic3	Czech Republic		Hrachoviste Pond	48.9289	14.7638		MN598749	This study
nana	A	A1	0083_CzechRepublic4	Czech Republic		Sand Pit, Svobodka	49.4744	13.9975		MN598750	This study
excisa	D	D2	0084_Canada5	Canada	Manitoba	A small tundra lake near Churchill	58.7543	-93.9626		MN598751	This study
excisa	D	D2	0085_Canada5	Canada	Manitoba	A small tundra lake near Churchill	58.7543	-93.9626		MN598752	This study
excisa	F	F1	0086_Canada6	Canada	Manitoba	A tributary of Burntwood River, Thompson	55.8168	-97.9232		MN598753	This study
exigua	C	C1	0087_Canada6	Canada	Manitoba	A tributary of Burntwood River, Thompson	55.8168	-97.9232		MN598754	This study
excisa	I	I2	0088_Canada7	Canada	Manitoba	A dtch by the road, M3	54.5954	-100.702		MN598755	This study
exigua	C	C1	0089_Canada8	Canada	Ontario	Starling Lake, Algonquin Provincial Park	45.5667	-78.4989	MN608150		This study
exigua	C	C1	0090_Canada8	Canada	Ontario	Starling Lake, Algonquin Provincial Park	45.5667	-78.4989	MN608151	MN598756	This study
excisa	K	K1	0091_Canada8	Canada	Ontario	Starling Lake, Algonquin Provincial Park	45.5667	-78.4989		MN598757	This study
excisa	K	K1	0092_Canada9	Canada	Ontario	Sasajewun Lake, Algonquin Provincial Park	45.5917	-78.5211		MN598758	This study
exigua	C	C1	0093_Canada10	Canada	Newfoundland	A ditch near the road, Grand Falls-Windsor	48.9501	-55.6079		MN598759	This study
		C1	DQ310643	Canada	Ontario	Starling Lake, Ontario, CA	45,34	-78,3	DQ310643		Sacherová , Hebert 2003
		C1	DQ889139	Canada		Not represented by the authors			DQ889139		Costa et al. 2007
		D2	JN233812_Canada1_ZMXII-503	Canada	Manitoba	Churchill, 16 km E Churchill, tundra ponds, tundra lake A	58,758	-93,911	JN233812		Jeffery et al. 2011
		D2	JN233813_Canada1_ZMXII-481	Canada	Manitoba	Churchill, 16 km E Churchill, tundra ponds, tundra lake A	58,758	-93,911	JN233813		Jeffery et al. 2011
		D2	JN233814_Canada2_ZPII525-07	Canada	Manitoba	Churchill, 16 km E Churchill, tundra ponds, tundra pond B	58,756	-93,913	JN233814		Jeffery et al. 2011
		D2	JN233815_Canada2_ZMXII-535	Canada	Manitoba	Churchill, 16 km E Churchill, tundra ponds, tundra pond B	58,756	-93,913	JN233815		Jeffery et al. 2011
		D2	JN233816_Canada2_ZMXII-523	Canada	Manitoba	Churchill, 16 km E Churchill, tundra ponds, tundra pond B	58,756	-93,913	JN233816		Jeffery et al. 2011
		D2	JN233817_Canada2_ZMXII-511	Canada	Manitoba	Churchill, 16 km E Churchill, tundra ponds, tundra pond B	58,756	-93,913	JN233817		Jeffery et al. 2011
		D2	JN233818_Canada2_ZMXII-361	Canada	Manitoba	Churchill, 16 km E Churchill, tundra ponds, tundra pond B	58,756	-93,913	JN233818		Jeffery et al. 2011
		D2	JN233819_Canada2_ZMXII-349	Canada	Manitoba	Churchill, 16 km E Churchill, tundra ponds, tundra pond B	58,756	-93,913	JN233819		Jeffery et al. 2011
		D2	JN233820_Canada3_08PROBE-2101	Canada	Manitoba	Churchill, 23 km SE Churchill, Twin Lakes Road fen, fen pond 1	58,654	-93,829	JN233820		Jeffery et al. 2011 (Online-only)
		D2	JN233821_Canada4_08PROBE-2117	Canada	Manitoba	Churchill, 14 km E Churchill, Golf Balls, pond	58,752	-93,916	JN233821		Jeffery et al. 2011 (Online-only)
		L2	KC616774_Mexico1_ZMXII-045	Mexico	Quintana Roo	Quintana Roo, Felipe Carrillo Puerto, Minicenote	19,607	-87,989	KC616774		Prosser et al. 2013
		L1	KC617204_Mexico2_HE-492	Mexico	Quintana Roo	Othon P. Blanco, Laguna Puente Milagros I	18,509	-88,447	KC617204		Prosser et al. 2013
		L1	KC617205_Mexico2_HE-492	Mexico	Quintana Roo	Othon P. Blanco, Laguna Puente Milagros I	18,509	-88,447	KC617205		Prosser et al. 2013
		L1	KC617470_Mexico3_HE-459	Mexico	Quintana Roo	Othon P. Blanco, Wetland in Puente Milagros	18,498	-88,443	KC617470		Prosser et al. 2013
		L1	KC617471_Mexico3_HE-458	Mexico	Quintana Roo	Othon P. Blanco, Wetland in Puente Milagros	18,498	-88,443	KC617471		Prosser et al. 2013
		L1	KC617472_Mexico3_HE-457	Mexico	Quintana Roo	Othon P. Blanco, Wetland in Puente Milagros	18,498	-88,443	KC617472		Prosser et al. 2013
		L1	KC617473_Mexico3_HE-458	Mexico	Quintana Roo	Othon P. Blanco, Wetland in Puente Milagros	18,498	-88,443	KC617473		Prosser et al. 2013
		L1	KC617474_Mexico3_HE-459	Mexico	Quintana Roo	Othon P. Blanco, Wetland in Puente Milagros	18,498	-88,443	KC617474		Prosser et al. 2013
		L1	KC617475_HE-460	Mexico	Quintana Roo	Othon P. Blanco, Wetland in Puente Milagros	18,498	-88,443	KC617475		Prosser et al. 2013
		L1	KC617476_Mexico3_HE-462	Mexico	Quintana Roo	Othon P. Blanco, Wetland in Puente Milagros	18,498	-88,443	KC617476		Prosser et al. 2013
		L1	KC617477_Mexico3_HE-461	Mexico	Quintana Roo	Othon P. Blanco, Wetland in Puente Milagros	18,498	-88,443	KC617477		Prosser et al. 2013
		L1	KC617478_Mexico3_HE-457	Mexico	Quintana Roo	Othon P. Blanco, Wetland in Puente Milagros	18,498	-88,443	KC617478		Prosser et al. 2013
		L1	KC617479_Mexico3_HE-462	Mexico	Quintana Roo	Othon P. Blanco, Wetland in Puente Milagros	18,498	-88,443	KC617479		Prosser et al. 2013
		L1	KC617480_Mexico3_HE-461	Mexico	Quintana Roo	Othon P. Blanco, Wetland in Puente Milagros	18,498	-88,443	KC617480		Prosser et al. 2013
		D2	OZFWC253-11_Canada	Canada	Manitoba	Churchill	58,758	-93,911	OZFWC253		BOLD direct submission
		D2	OZFWC285-11_Canada	Canada	Manitoba	Churchill	58,758	-93,911	OZFWC285		BOLD direct submission
		D2	OZFWC314-11_Canada	Canada	Manitoba	Churchill	58,758	-93,911	OZFWC314		BOLD direct submission
		D2	OZFWC348-11_Canada	Canada	Manitoba	Churchill	58,758	-93,911	OZFWC348		BOLD direct submission
		D2	OZFWC351-11_Canada	Canada	Manitoba	Churchill	58,758	-93,911	OZFWC351		BOLD direct submission
		D2	OZFWC368-11_Canada	Canada	Manitoba	Churchill	58,758	-93,911	OZFWC368		BOLD direct submission
		D2	OZFWC371-11_Canada	Canada	Manitoba	Churchill	58,758	-93,911	OZFWC371		BOLD direct submission
		D2	OZFWC417-11_Canada	Canada	Manitoba	Churchill	58,758	-93,911	OZFWC417		BOLD direct submission
		D2	OZFWC423-11_Canada	Canada	Manitoba	Churchill	58,758	-93,911	OZFWC423		BOLD direct submission
		D2	OZFWC632-12_Canada	Canada	Manitoba	Churchill	58,758	-93,911	OZFWC632		BOLD direct submission
		L1	ZMIII675-12_Mexico	Mexico	Quintana Roo	Othon P. Blanco	18,498	-88,443	ZMIII675		BOLD direct submission
		L1	ZMIII770-12_Mexico	Mexico	Quintana Roo	Othon P. Blanco	18,498	-88,443	ZMIII770		BOLD direct submission
		L1	ZPII084-07_Mexico	Mexico	Quintana Roo	Felipe Carrillo Puerto	19,607	-87,989	ZPII084		BOLD direct submission
		outgroup	Alona_affinis_DQ470586	Denmark	Sealand	Mølleåen, Sealand, Denmark.	55.8	12.5	DQ470586		Stenderup et al. 2006
		outgroup	Alona_setulosa_KC617460	Mexico	Puebla	Mexico: Puebla, Palmar de Bravo, Well of water	18,837	-97,458	KC617460		Prosser et al. 2013
